# Supplementary material
Source: PubMed Central journal article supplement (PMC3314474)

**RhoGDI2 suppresses metastasis via reduction of versican expression and macrophage infiltration in murine models**

Neveen Said <sup>1</sup>, Steven C. Smith <sup>1</sup>, Marta Sanchez-Carbayo <sup>2</sup> and Dan Theodorescu <sup>3,4\*</sup>

<sup>1</sup> Department of Urology, University of Virginia, <sup>2</sup> Spanish National Cancer Institute (CNIO),

<sup>3</sup> Departments of Surgery and Pharmacology, University of Colorado

<sup>4</sup> University of Colorado Comprehensive Cancer Center.

**Type:** Regular Article

**Key Words:** bladder cancer, metastasis, RhoGDI2, versican, inflammation

**Running Title:** RhoGDI2 Suppresses Bladder Cancer Metastasis

\* **Corresponding Author:** Dan Theodorescu, Departments of Surgery and Pharmacology and Comprehensive Cancer Center, University of Colorado, Aurora, Colorado 80045, USA. Phone: 303-724-7135; Fax: 303-724-3162; E-mail: [dan.theodorescu@ucdenver.edu](mailto:dan.theodorescu@ucdenver.edu).

## SUPPLEMENTARY FIGURES

**Supplement Figure 1. a.** Engineered UMUC3 cells in **Figure 3** were allowed to invade through 8- $\mu$ m pore polycarbonate inserts coated with either matrigel, or confluent monolayers of primary human pulmonary microvascular endothelial cell (PMVECs) towards complete growth medium (CGM) or U937 in the bottom chamber. **b.** Monolayers of transfected/transduced cancer cells allowed to attract U937 cells through 3- $\mu$ m pore inserts coated with either matrigel or confluent monolayers of PMVECs. Invading/attracted cells on the undersurface of the filters were counted. Bars represent mean  $\pm$  SEM of three independent experiments performed in triplicates. \* $P$ <0.05, Students' $t$ -test.

**Supplement Figure 2. RhoGDI2 and versican expression in T24/T24 cell lines. a.** Western blots (WB) showing the expression of endogenous Rho-GDI2 protein in the two isogenic cell lines T24 and T24T. **b.** WB showing the expression of V1 and V3 versican in T24T and T24 cells were transduced with lentiviruses shRNA targeting all VCAN isoforms (shVCAN), an irrelevant target (non-target, NTsh) or **c.** retroviruses overexpressing V1, and V3 and their empty vector controls (VC), respectively. Equal protein loading was confirmed by tubulin (tub).

**Supplement Figure 3. GDI2 modulates cancer cell-macrophage interactions through VCAN in T24/T24T isogenic cell lines.** effect of depletion of versican in T24T (upper) and overexpression of V1 and V3 in T24 cells (lower) on their ability to: **a.** invade through 8- $\mu$ m pore polycarbonate inserts coated with matrigel towards complete growth medium (CGM, lower left) or U937 lower right) in the bottom chamber. **b.** invade through 8- $\mu$ m pore polycarbonate inserts coated with PMVECs towards complete growth medium (CGM, lower left) or U937 (lower right) in the bottom chamber. **c.** monolayers of T24T and T24 depleted of (upper) or overexpressing (lower) VCAN were allowed to attract U937 cells through 3- $\mu$ m pore inserts coated with either matrigel or confluent monolayers of PMVECs. Invading/attracted cells on the undersurface of the filters were counted. Bars represent mean  $\pm$  SEM of three independent experiments performed in triplicates. \* $P$ <0.05, Students' $t$ -test.

**Supplement Figure 4. Depletion of VCAN in T24T cells abrogates their metastatic capability. a.** Photos of lung metastasis (circled in yellow) and scatter plot of the incidence and number of visible metastases (mets) 6W post-injection of T24T-NTsh and T24T-shVCAN cells developing after tail vein injection of  $1 \times 10^6$  cancer cells in nude mice. \* $P$ <0.05,  $\chi^2$  test; comparing the incidence, and \*\* $P$ <0.01, Student's  $t$  test, comparing the number of mets. **b.** WB of the expression of VCAN isoforms in representative lung lysates (n=2) 6W post-injection of cancer cells **c.** Macrophages infiltration in metastatic foci (circled in yellow) and surrounding lung parenchyma was determined by mac2 immunostaining. Bars represent the mean $\pm$ SEM of macrophage number, counted in 6 random high power fields (HPF); \*\* $P$ <0.01, Student's  $t$ -test. **d-e.** Human IL-6, and CCL2 (hIL-6, hCCL2), murine IL-6, and CCL2 (mIL-6, mCCL2), and Cox2 activity were determined in lungs' lysates. Bars represent mean $\pm$ SEM, (n=3, performed in duplicates). \* $P$ <0.05, \*\* $P$ <0.01 Student's  $t$ -test.

# Supplement Figure 1

**a**

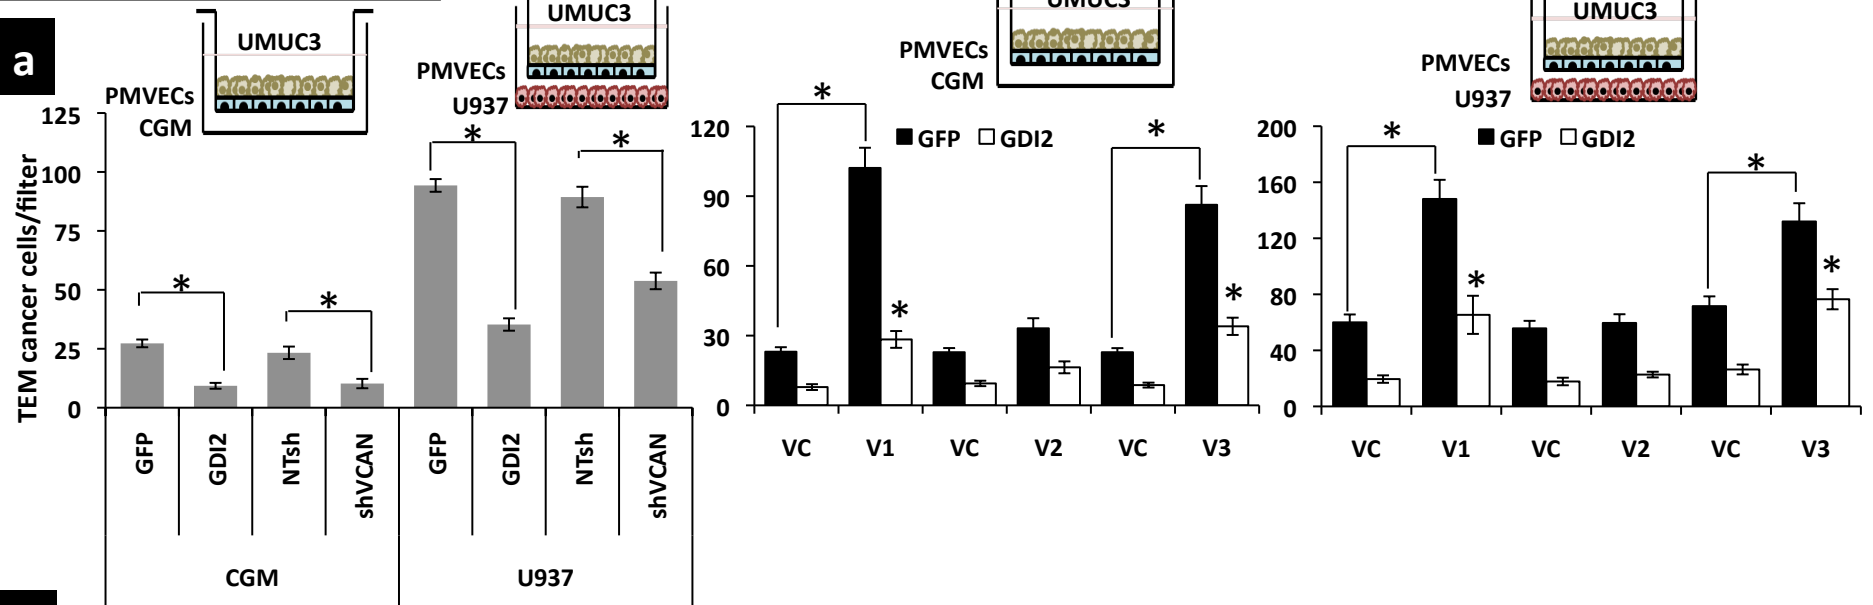

**b**

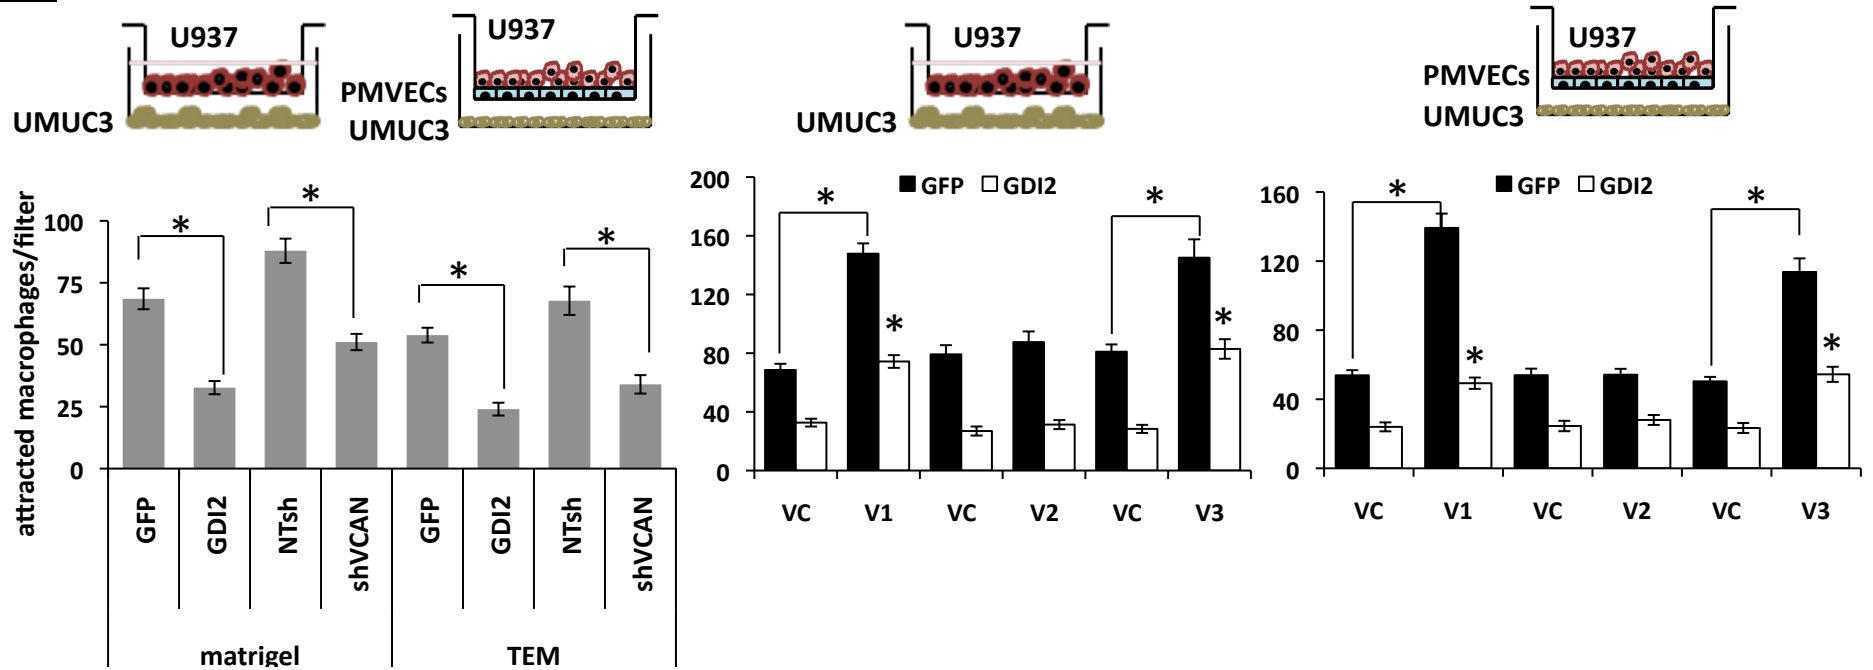

# Supplement Figure 2

**a**

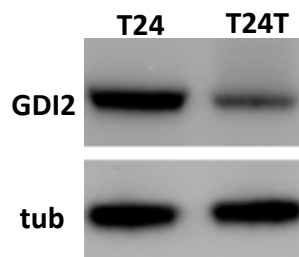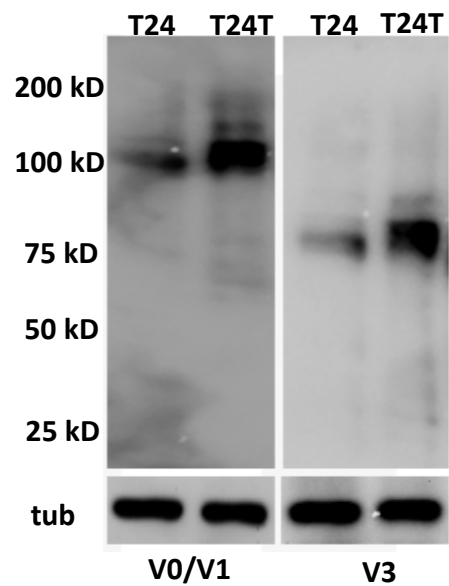

**b**

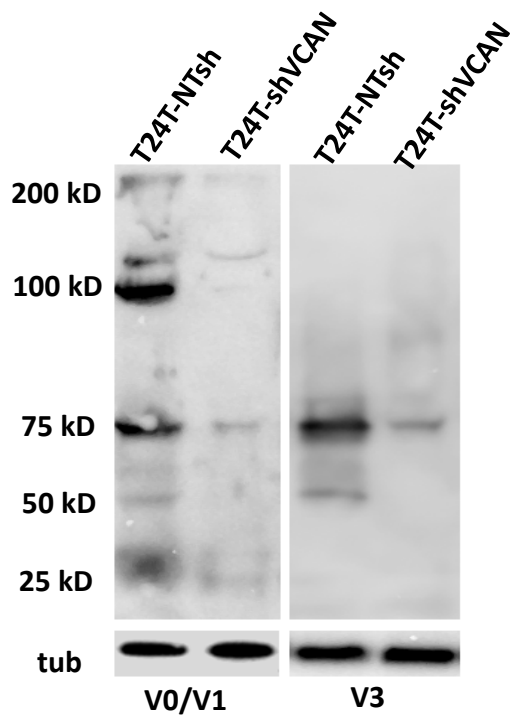

**c**

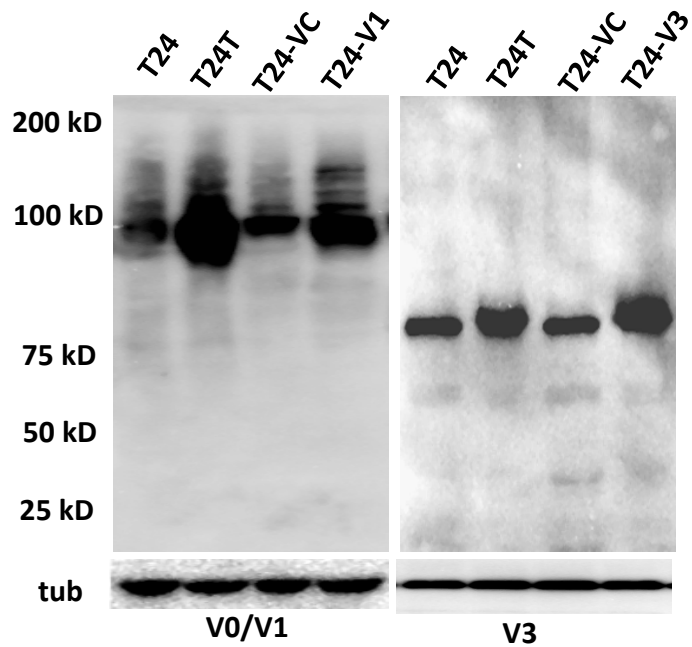

# Supplement Figure 3

a

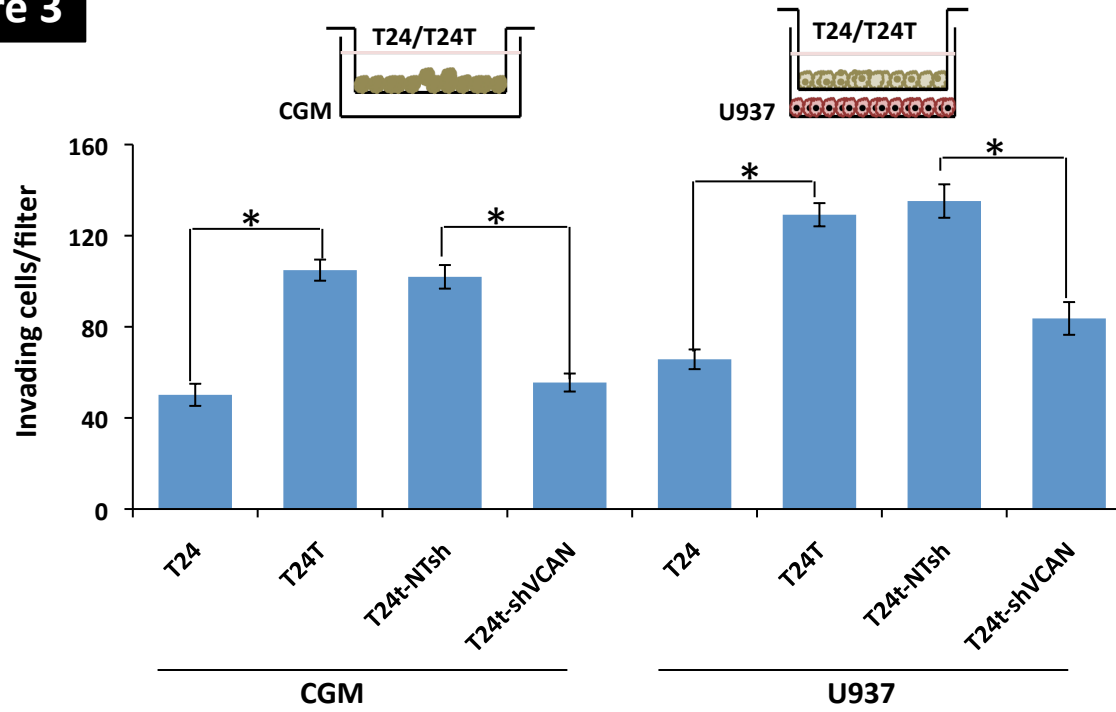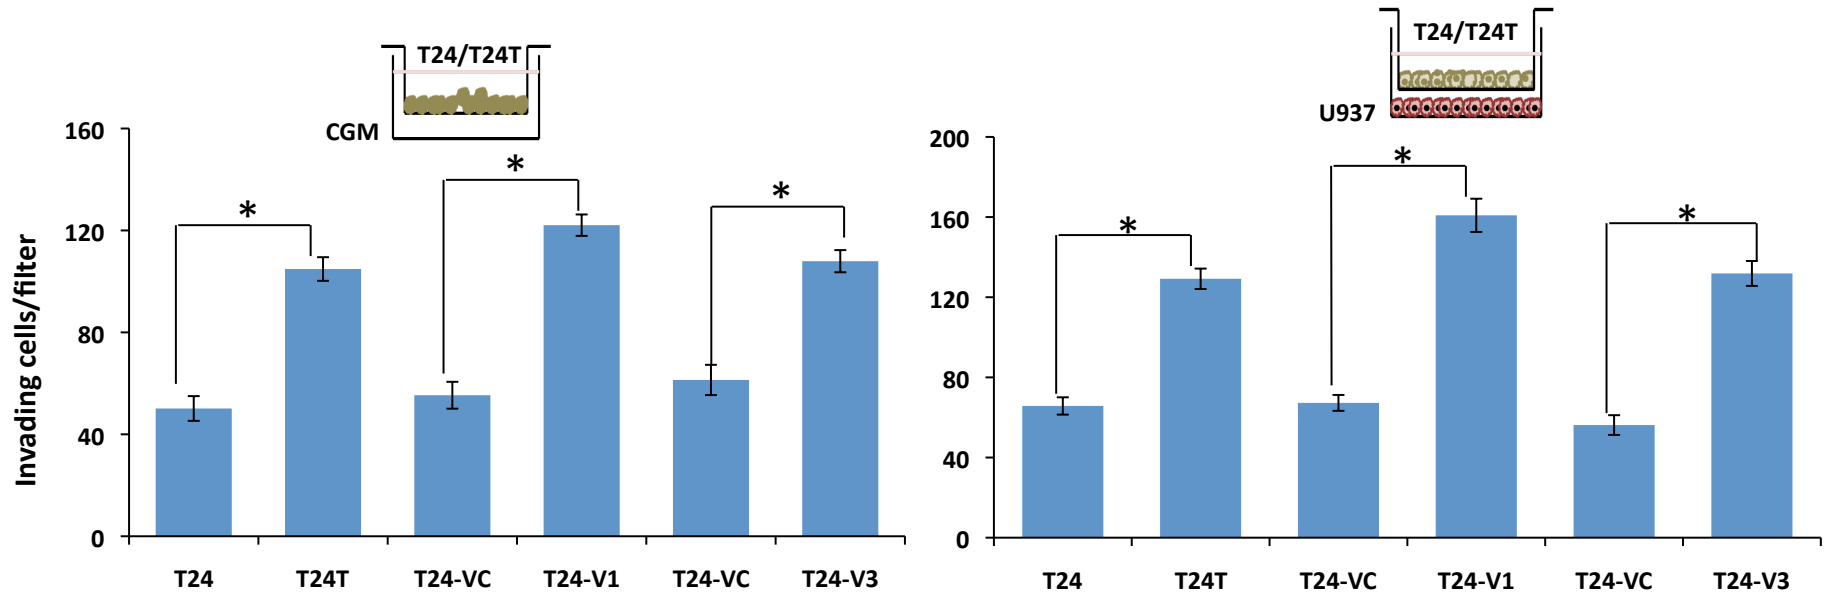

# Supplement Figure 3

**b**

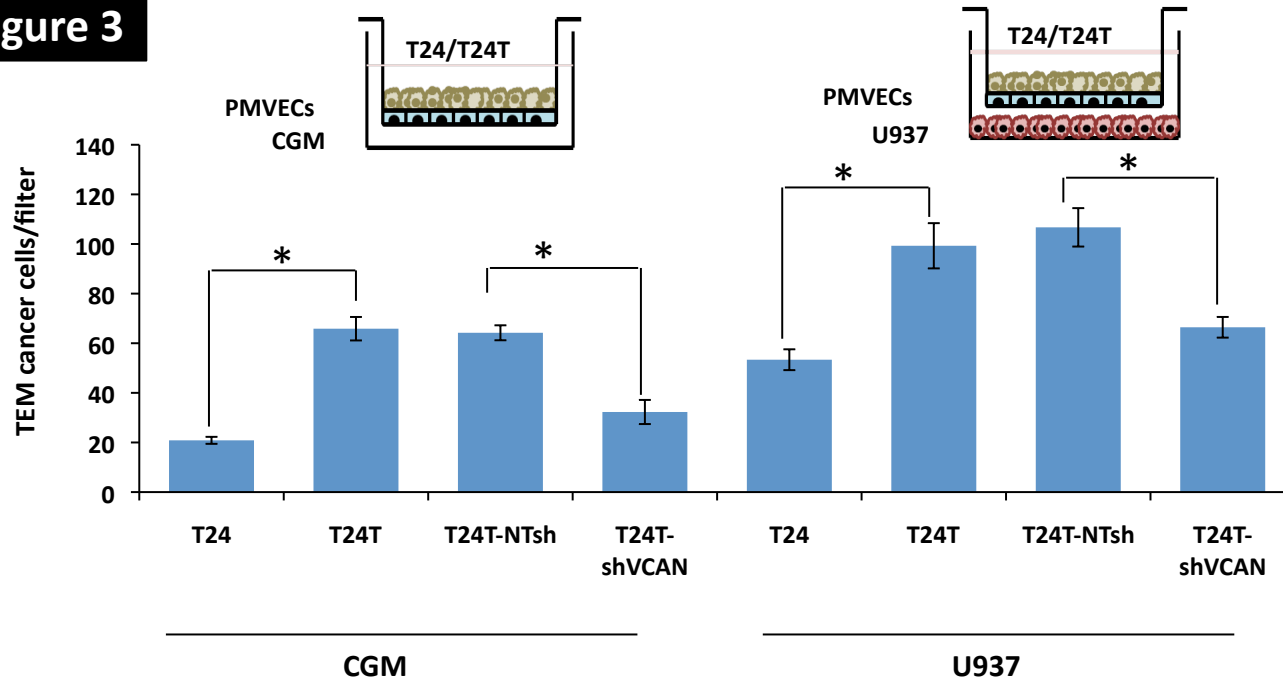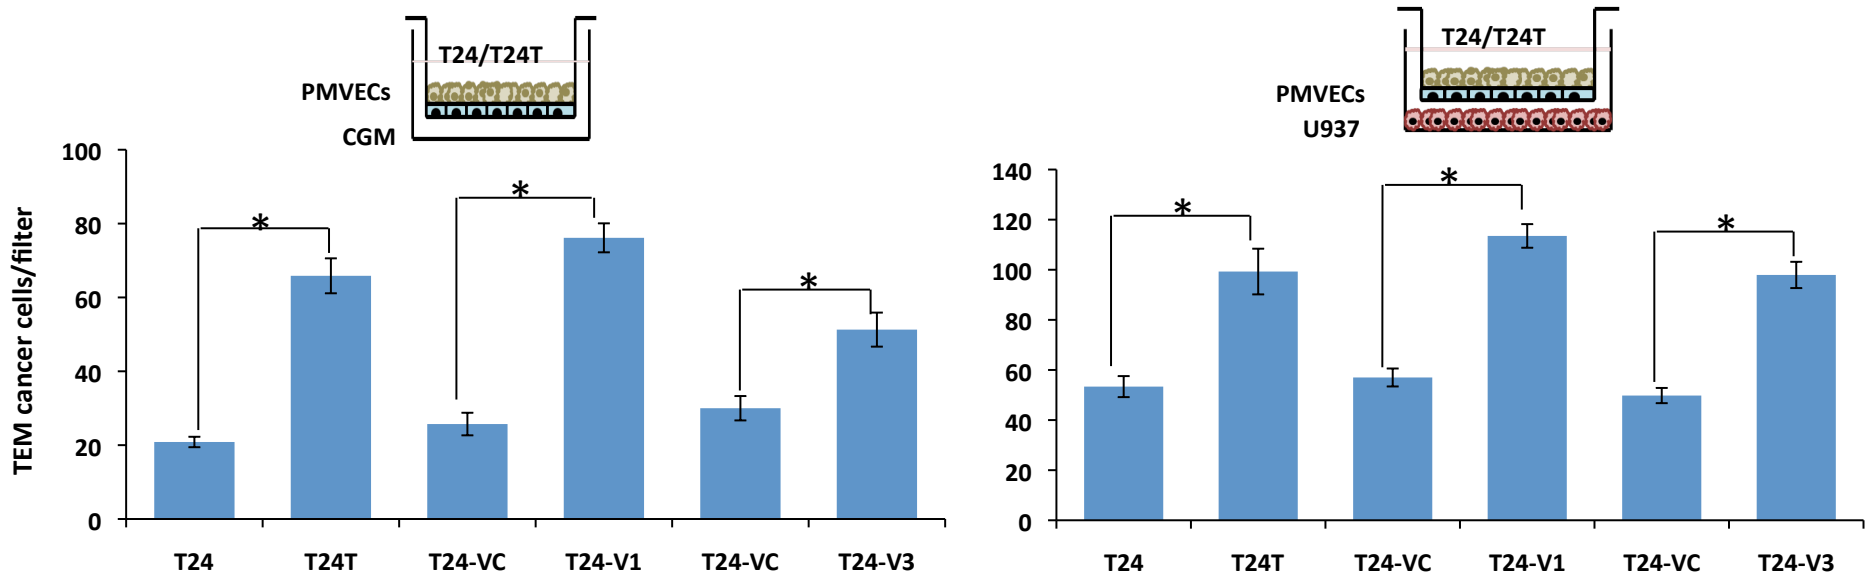

# Supplement Figure 3

C

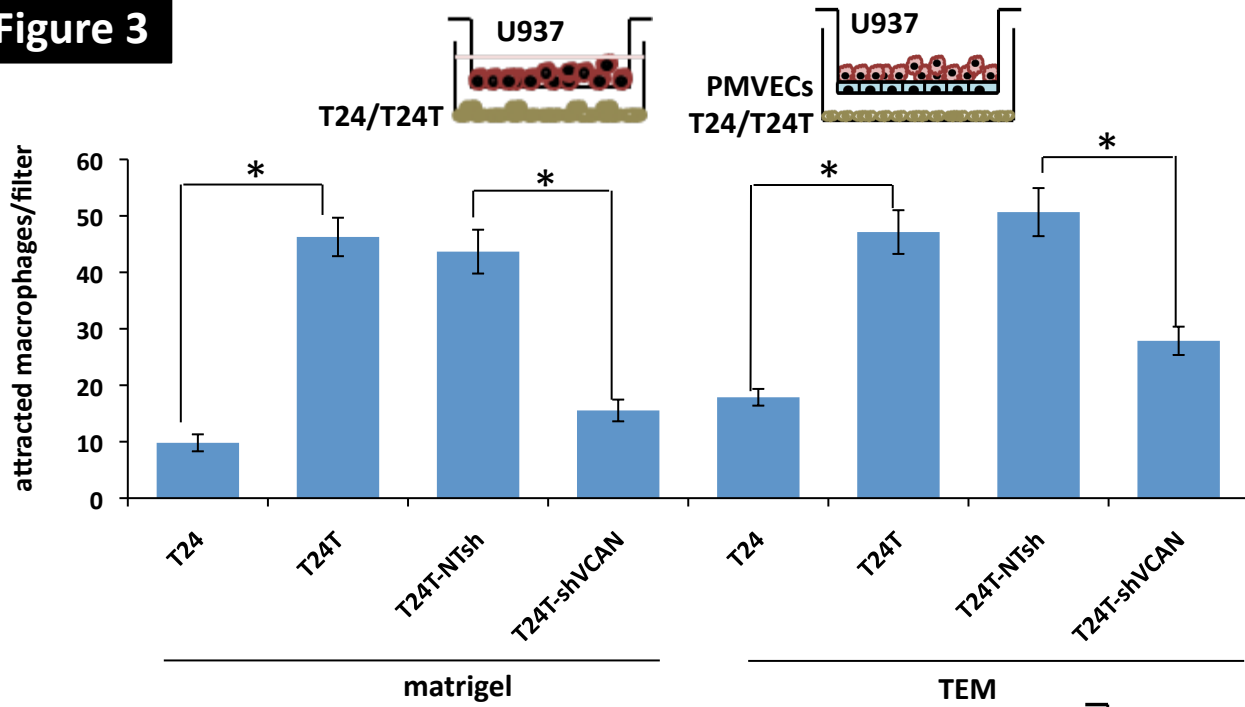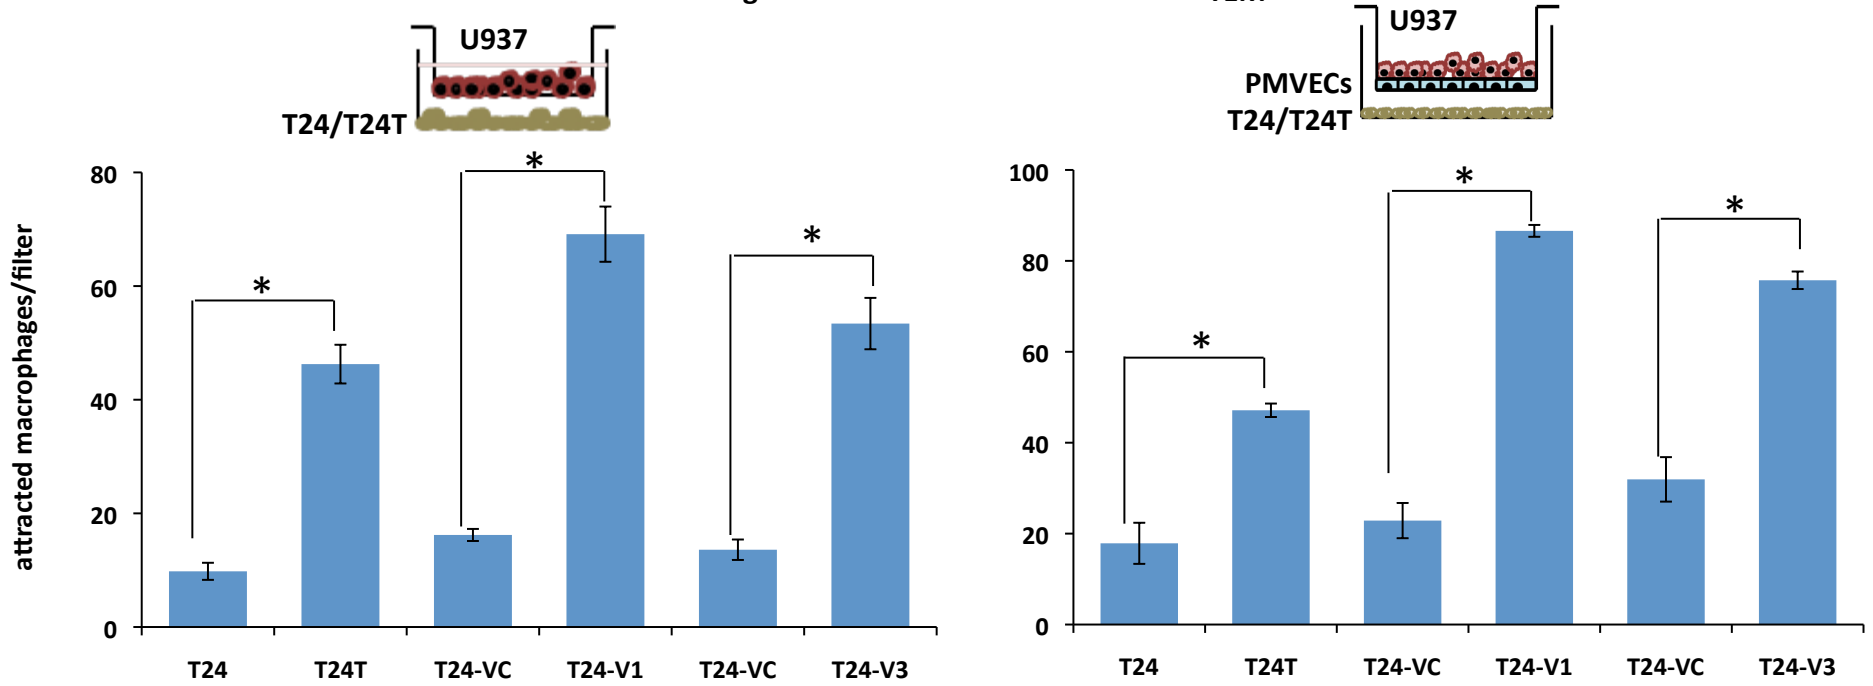

# Supplement Figure 4

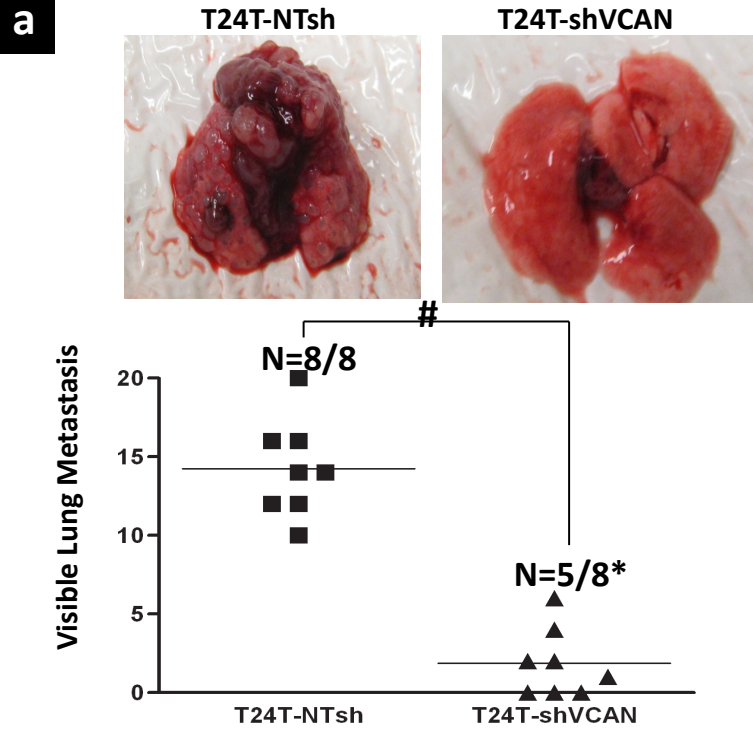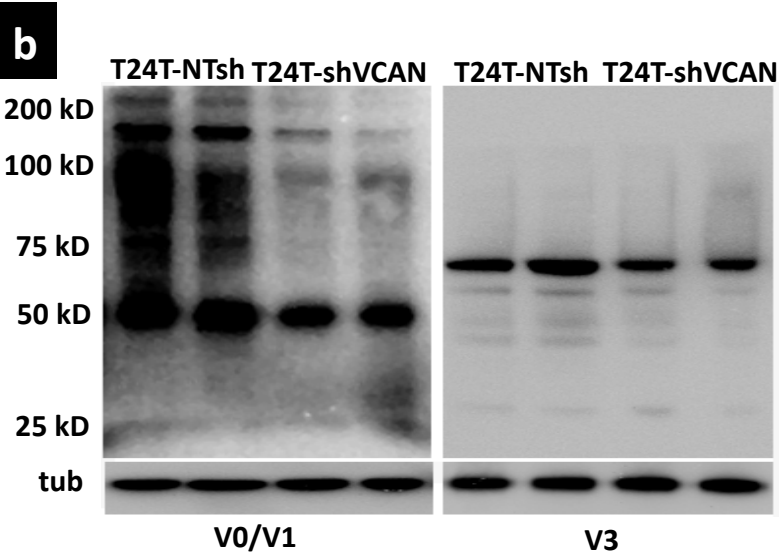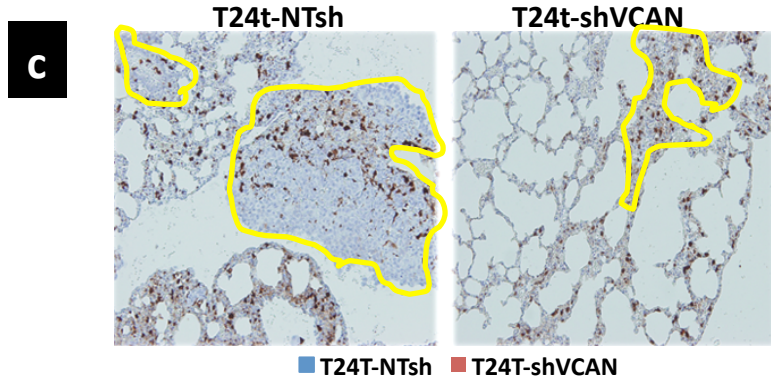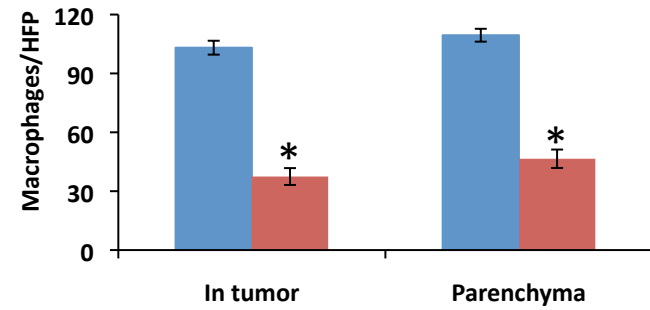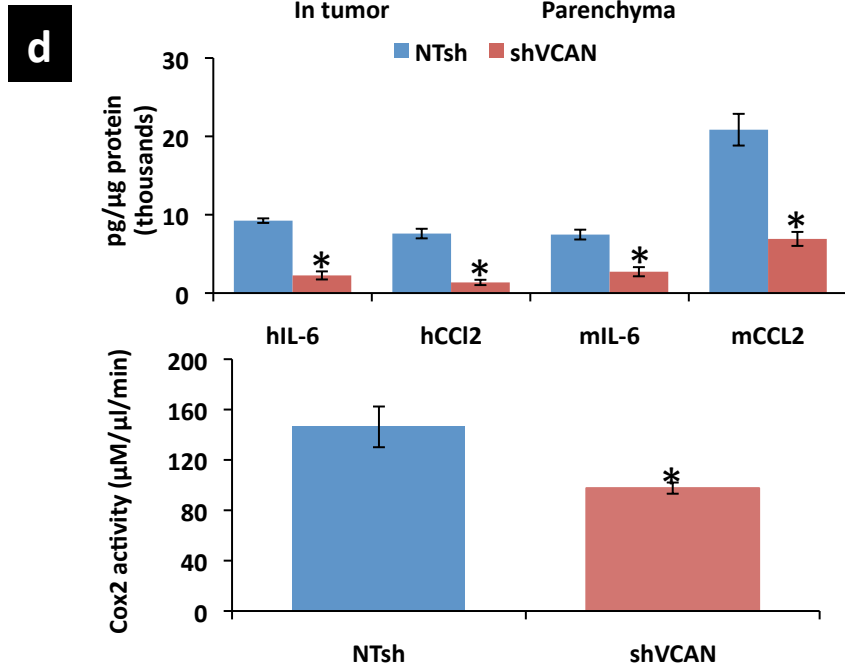

Supplement: JCI61392sd.pdf [file JCI61392sd.pdf]
